# Supplementary material for: Two approaches reveal a new paradigm of ‘switchable or genetics-influenced allele-specific DNA methylation’ with potential in human disease
Source: PubMed Central journal article supplement (PMC5787696; doi:10.1038/celldisc.2017.38), 2017-11-14

## Supplementary Information

### **Supplementary Table 1. Methylation across well-characterized, imprinted germline ASMs**

Excel File

### **Supplementary Table 2. List of 2468 NORED regions**

Excel File

### **Supplementary Table 3. List of 2487 MethyIMosaic bimodal regions**

Excel File

### **Supplementary Table 4. Gene set enrichment for 2468 NORED regions**

Excel File

### **Supplementary Table 5. Gene set enrichment for 2487 MethyIMosaic bimodal regions**

Excel File

### **Supplementary Table 6. Gene set enrichment for 207 bimodal NORED regions**

Excel File

### **Supplementary Table 7. Gene set enrichment for 2261 NORED exclusive regions**

Excel File

### **Supplementary Table 8. Gene set enrichment for 2335 MethyIMosaic bimodal exclusive regions**

Excel File

**Supplementary Figure 1. Coverage and methylation level for WT, 1KO, r1KO, DKO, and TKO ESCs.** (a - e) Coverage per CpG site in WT (a), 1KO (b), r1KO (c), DKO (d), and TKO (e) ESCs. (f) Distribution of CpG methylation for CpG sites with minimum coverage of five in ESCs. Global average methylation for all covered CpG sites in WT, 1KO, r1KO, DKO, and TKO was 0.727, 0.176, 0.369, 0.157, 0.006, respectively.

**Supplementary Figure 2. NORED method evaluation.** (a) ROC-like curve for individual CpG sites that meet three NORED criteria at various cutoffs for WT, 1KO, and r1KO. Cutoff for WT parameter is a circle for 0.25 and a triangle for 0.30. Cutoff for 1KO parameter is indicated by color. Each circle/triangle represents a tested r1KO value for combinations of WT and 1KO. For r1KO values are between WT and 1KO cutoffs at increments of 0.005. Circle with black outline indicates values for three parameters to select individual CpG sites to combine into regions (r1KO = 0.125). (b) Proportion of gASMs identified compared to region-level FDR

**Supplementary Figure 3. MethyIMosaic method evaluation.** (a) ROC-like curve for CpG-centered windows at various cutoffs for hypermethylation and hypomethylation indices (see Methods) Red point indicates bounds for indices (between 0.2 to 0.75) to select CpG-centered windows to combine into regions. (b) Proportion of gASMs identified at region-level FDR.

**Supplementary Figure 4. Overlap of NORED and MethylMosaic demonstrates that two methods are independent, but complementary.** (a) Proportion of NORED regions that are also bimodal in MethylMosaic at various FDRs for each method. Total number of NORED regions at each FDR cutoff is listed to the right. (b) Proportion of MethylMosaic regions that are also NORED at various FDRs for each method. Total number of MethylMosaic regions at each FDR cutoff is listed below.

**Supplementary Figure 5. Genomic sequencing confirms that WT ESCs are homozygous at *Hcn2/Polrmt* locus.**

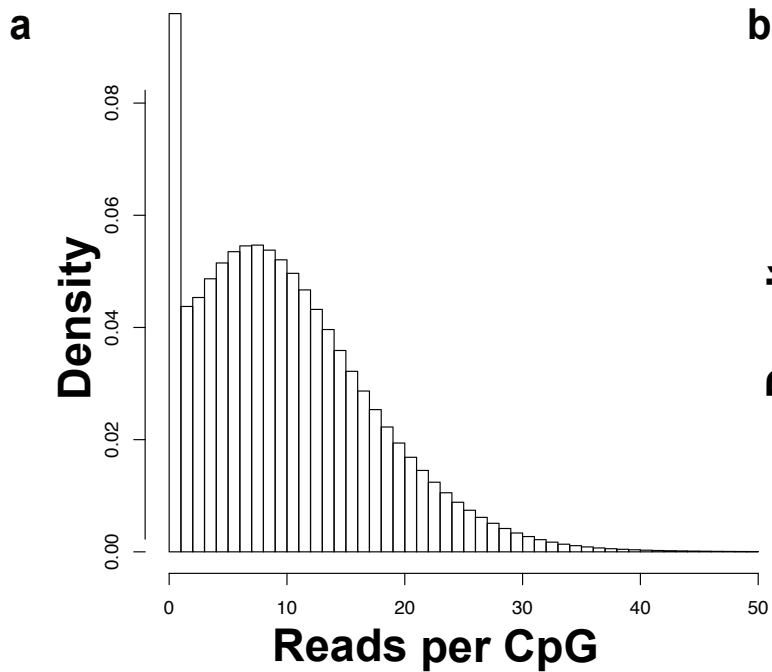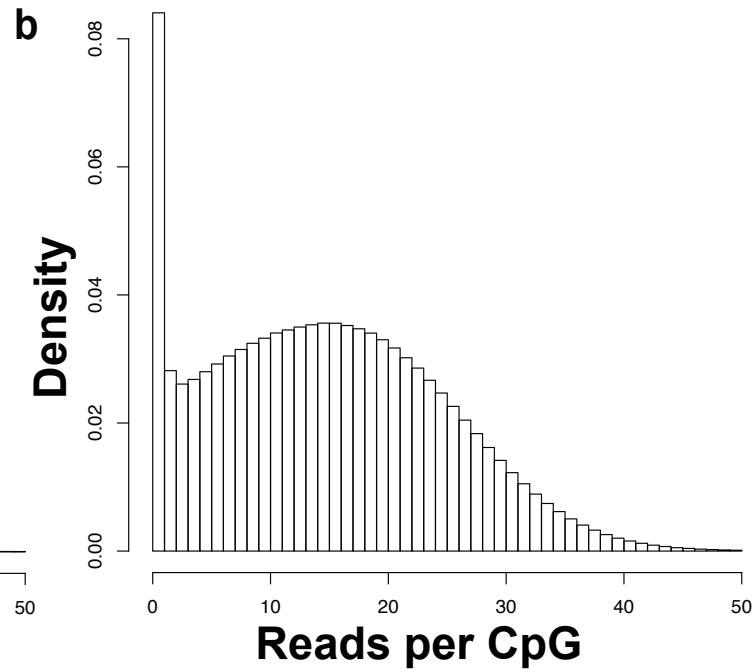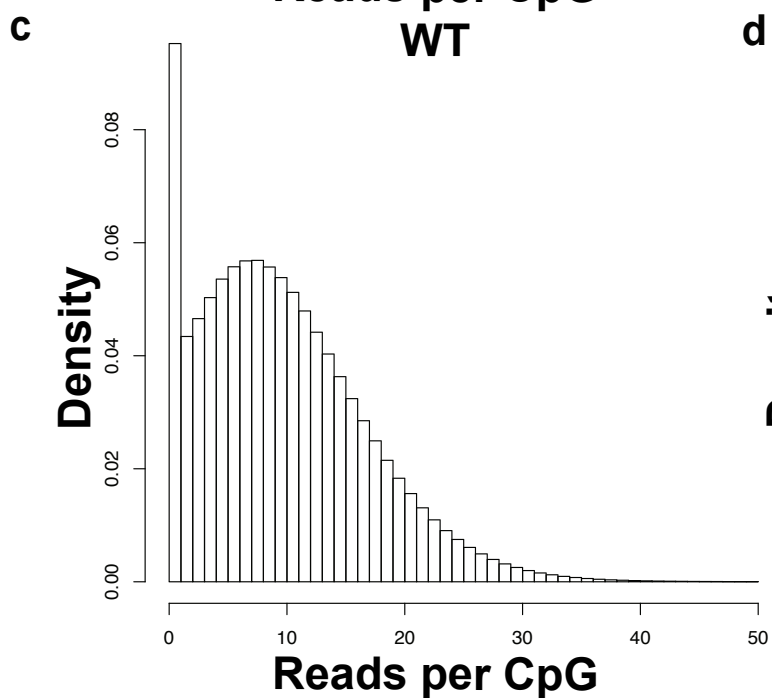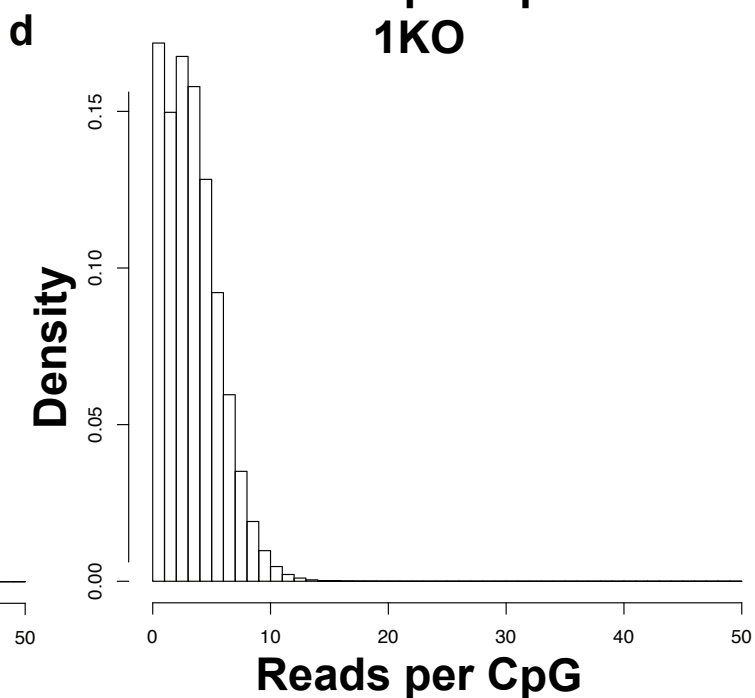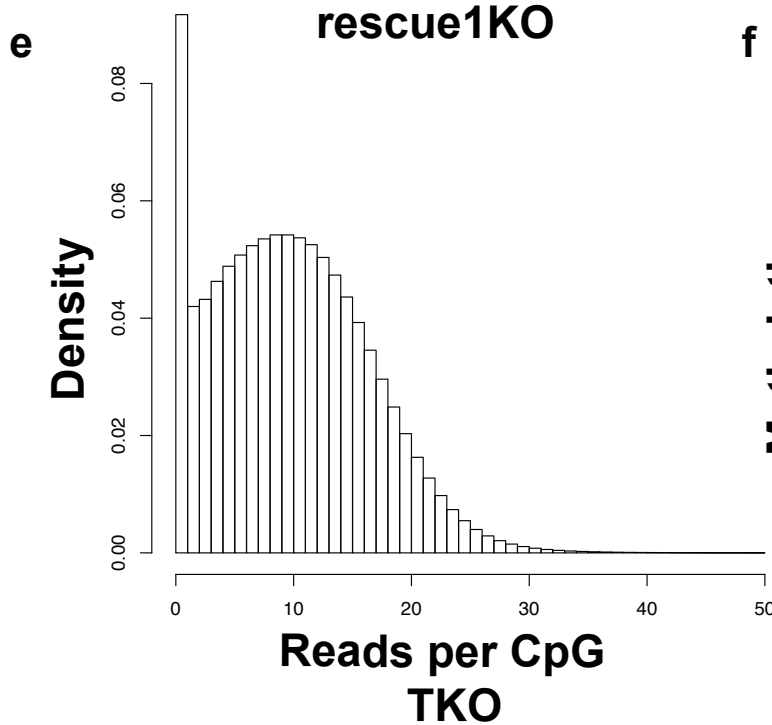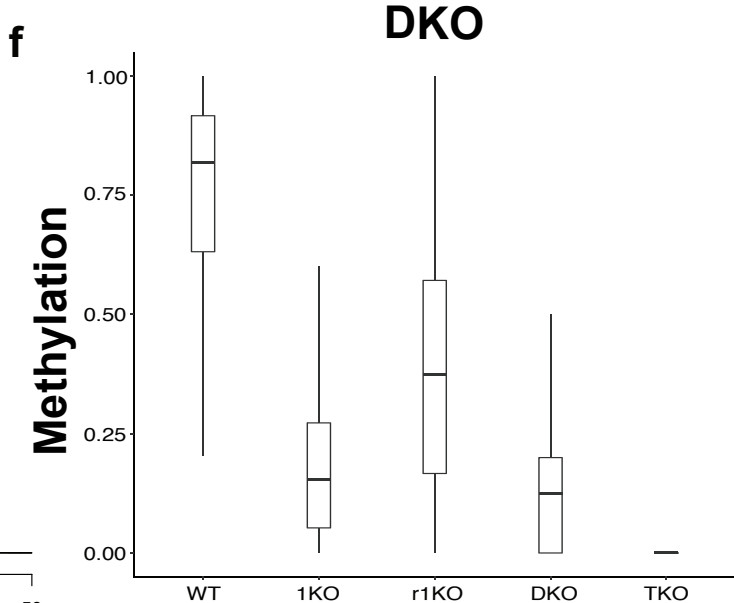

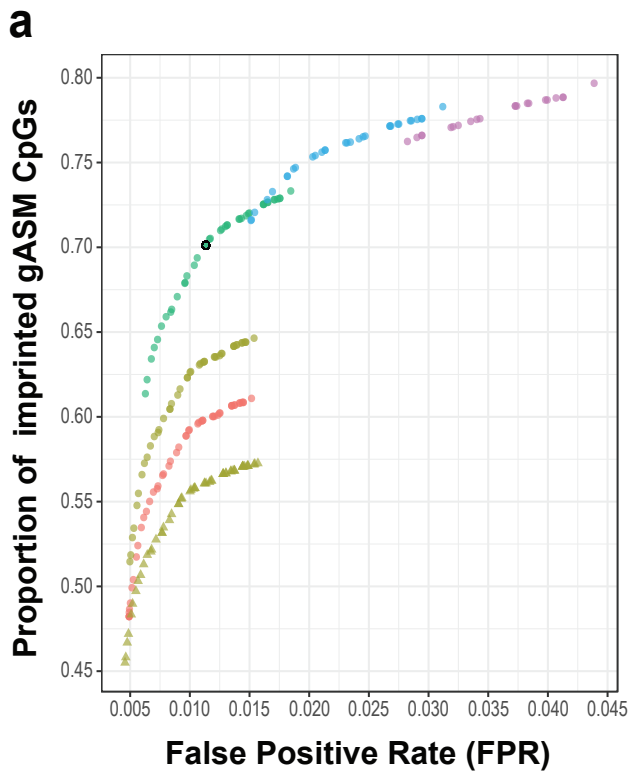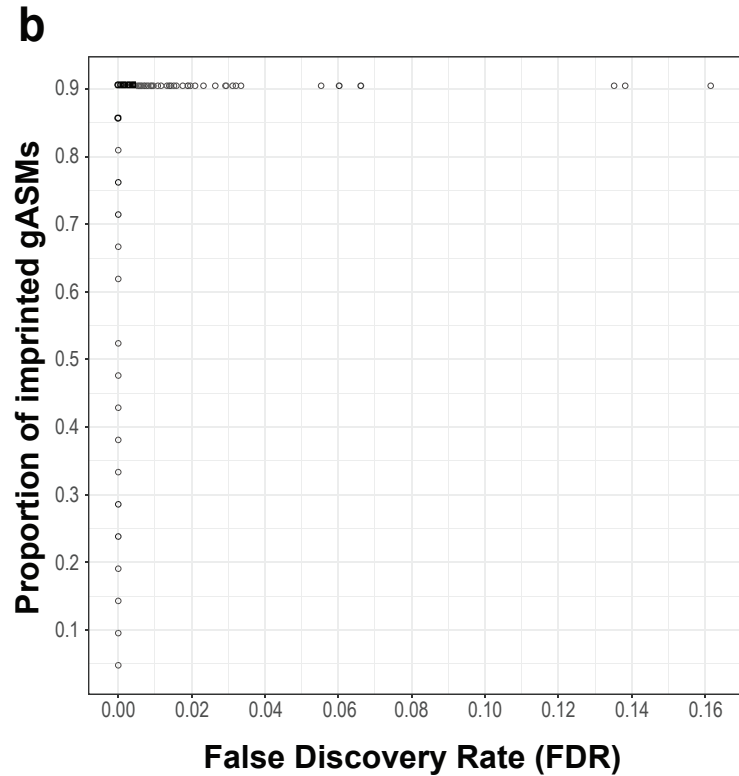

**a**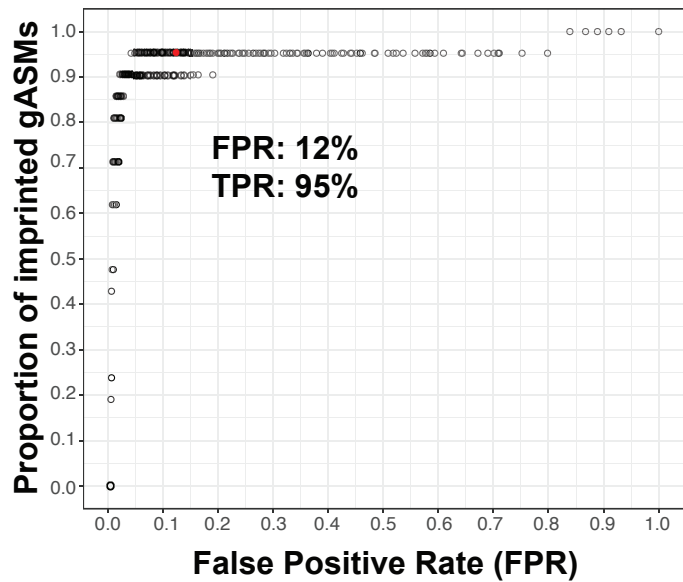**b**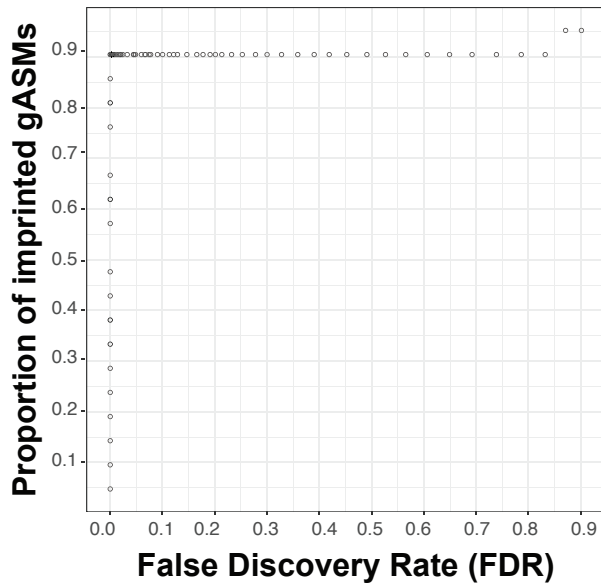

a

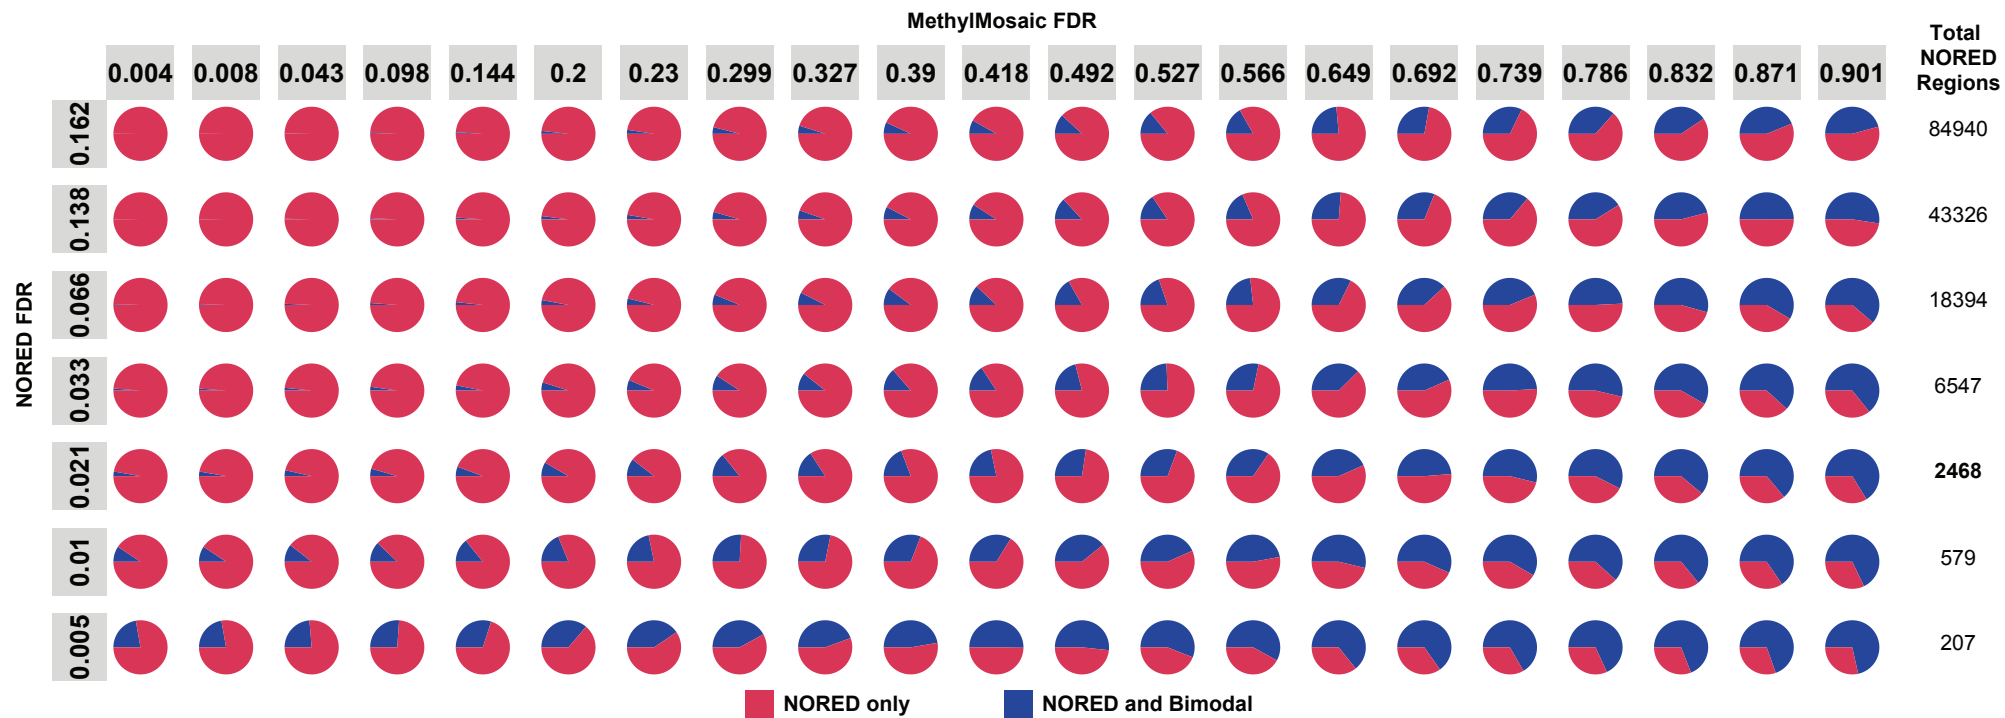

b

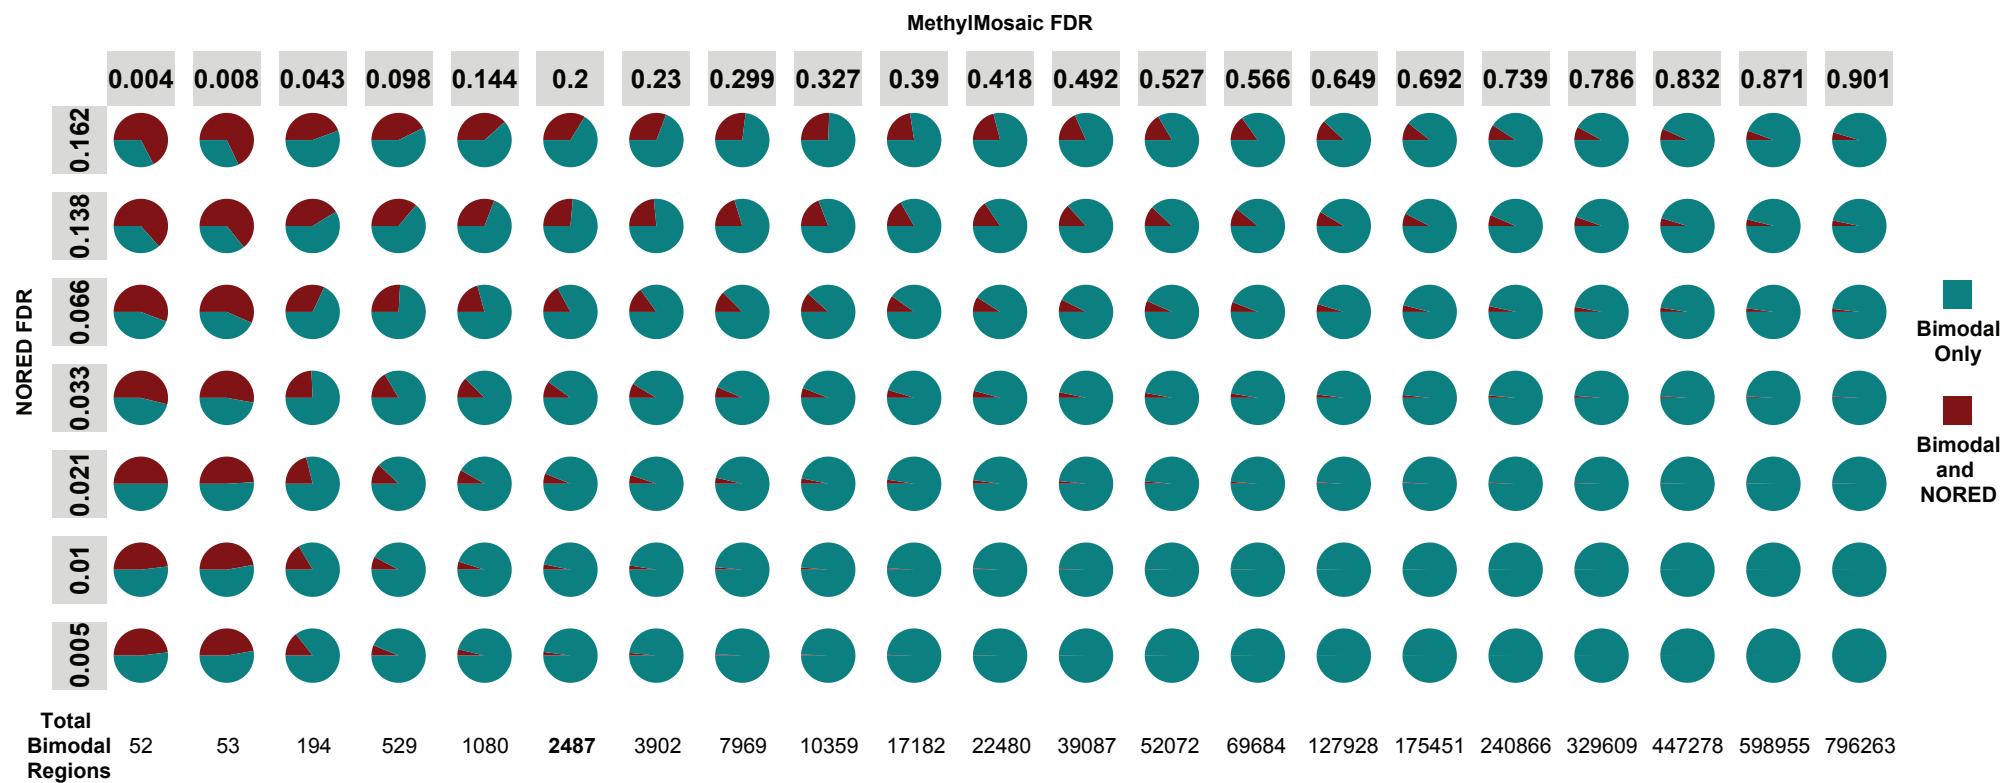

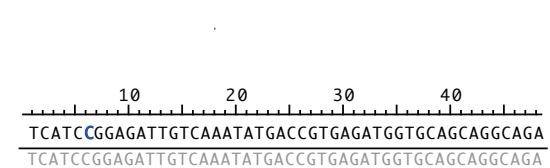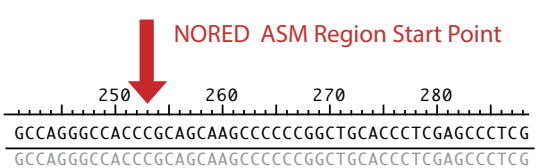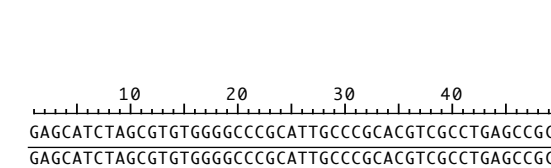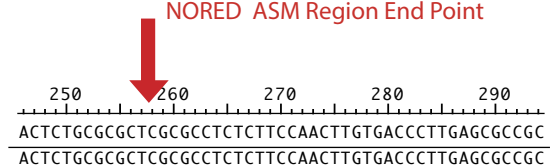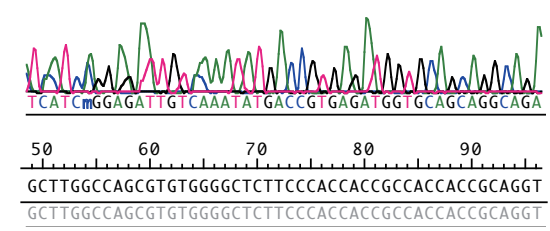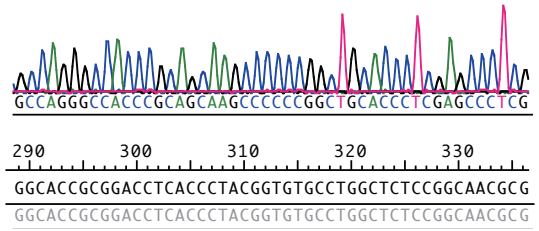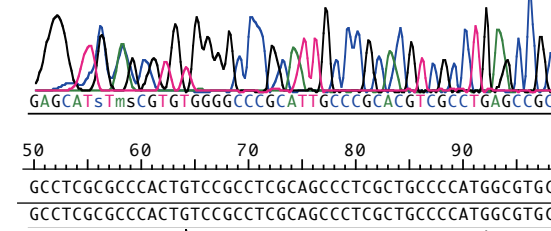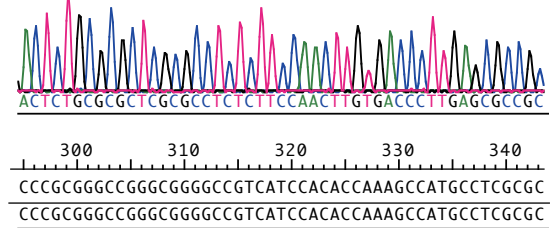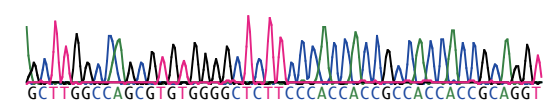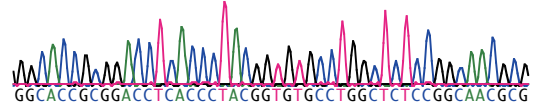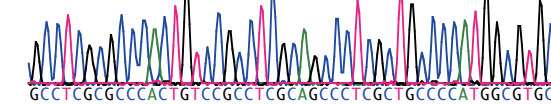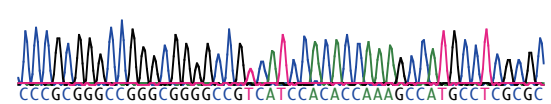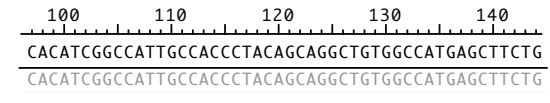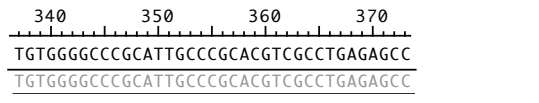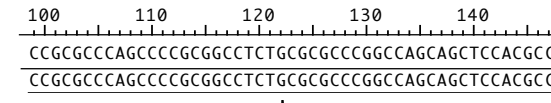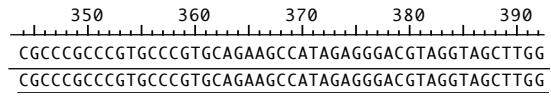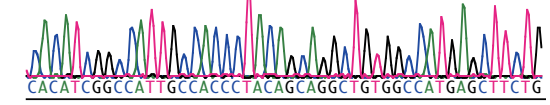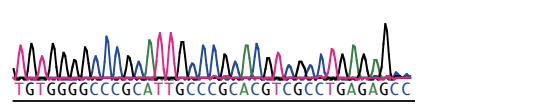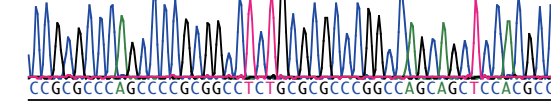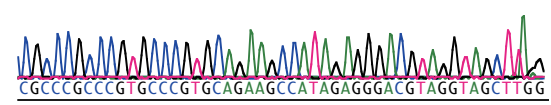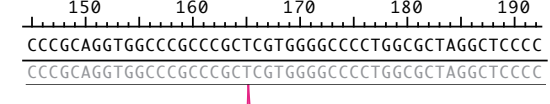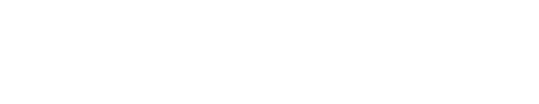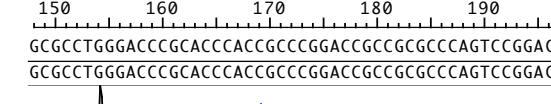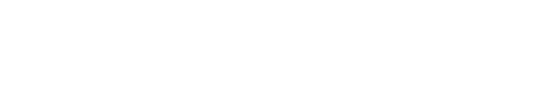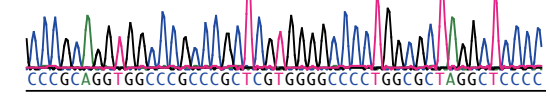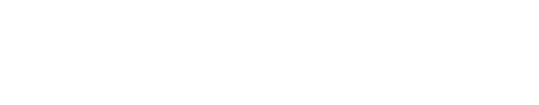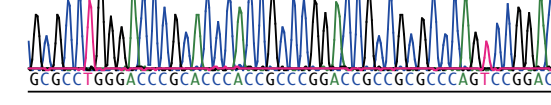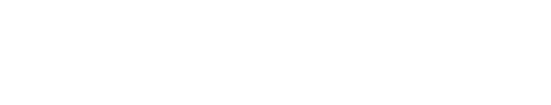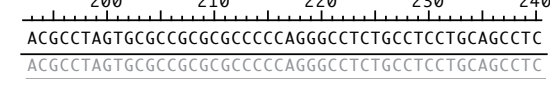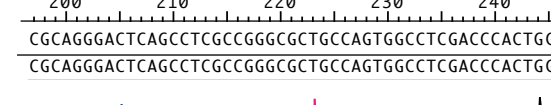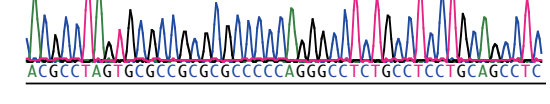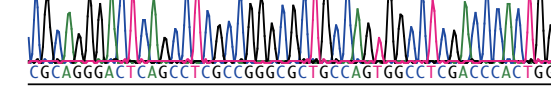

Supplement: celldisc201738-s1.pdf [file celldisc201738-s1.pdf]
